# Supplementary material for: Near-infrared manipulation of multiple neuronal populations via trichromatic upconversion
Source: PubMed Central journal article supplement (PMC8476604; doi:10.1038/s41467-021-25993-7), 2021-09-27
Supplement: 41467_2021_25993_MOESM3_ESM.pdf [file 41467_2021_25993_MOESM3_ESM.pdf]

**Title:** Supplementary Movie 1:

**Description:** Trichromatic UCNPs for orthogonal RGB emission

**Title:** Supplementary Movie 2:

**Description:** NIR dual-color control of mice motor function
